# Supplementary material for: Solvent-free and melt aerobic oxidation of benzyl alcohols using Pd/Cu2(BDC)2DABCO–MOF prepared by one-step and through reduction by dimethylformamide
Source: Royal Society of Chemistry journal article supplement (doi:10.1039/c7ra07209k), 2017-01-01
Supplement: c7ra07209k1.pdf [file c7ra07209k1.pdf]

## Supporting Information

### **Solvent-free and Melt Aerobic Oxidation of Benzyl Alcohols Using Pd@Cu<sub>2</sub>(BDC)<sub>2</sub>DABCO Prepared Through Reduction by Dimethylformamide**

Javad Mokhtaria\*<sup>a</sup>, Sara Akbari <sup>a</sup>, Zohreh Mirjafari <sup>a</sup>

<sup>a</sup> Department of Chemistry, Science and Research Branch, Islamic Azad University, P.O. Box 14515/775, Tehran, Iran. Corresponding author e-mail address: j.mokhtari@srbiau.ac.ir

## Materials and instruments

All reagents including organic linker H<sub>2</sub>BDC, metal salt Cu(OAc)<sub>2</sub>·H<sub>2</sub>O, 1,4-benzenedicarboxylate (BDC, 99%), 1,4-diazabicyclo[2.2.2]octane (DABCO), Palladium (II) chloride (PdCl<sub>2</sub>), benzyl alcohols and solvent were obtained from commercially available sources such as Sigma–Aldrich and Merck without any purification. X-ray powder diffraction (XRD) measurements were performed using an X’pert MPD. Philips diffractometer with Cu radiation source ( $\lambda = 1.54050\text{ \AA}$ ) at 40 Kv voltage and 40 mA current. BET (Brunauer-Emmett-Teller) surface area of the samples was determined from N<sub>2</sub> adsorption–desorption isotherms using a micromeritics ASAP 2020 analyzer. The sample was characterized using a scanning electron microscope (SEM) with a ZEISS at 30 kV with gold coating. Transmission electron microscopy (TEM) was carried out using an EM10C-100kV series microscope from the Zeiss Company, Germany. The actual loading of palladium was determined by Inductively Coupled Plasma (ICP) analysis on sequential plasma spectrometer, Shimadzu (ICPS-7000 ver. 2). X-ray photoelectron spectroscopy (XPS) measurements were conducted on a PHI Quantum 2000 XPS system equipped with an Al Xray source (1486.6 eV). <sup>1</sup>H-NMR spectra were measured (CDCl<sub>3</sub>) with a Bruker DRX-500 AVANCE spectrometer at 400.13. Melting points were measured on an Electrothermal 9100 apparatus and GC analysis of determination of conversions and selectivities was performed on an Agilent 6890N.

### **One-step Supporting of Palladium Nanoparticle (Pd@Cu<sub>2</sub>(BDC)<sub>2</sub>(DABCO))**

[Cu<sub>2</sub>(BDC)<sub>2</sub>DABCO] was synthesis by that are reported in our previous work [44]. A mixture of Cu(OAc)<sub>2</sub>.H<sub>2</sub>O (0.6 mmol), H<sub>2</sub>BDC (0.6 mmol) and DABCO (0.3 mmol) with molar ratio of 2:2:1 were ball-milled vigorously at 28 Hz at room temperature for 2 hours. The obtained green powder was washed with DMF (3 × 10 mL). Solvent exchange was carried out with methanol (3 × 10 mL) at room temperature. To remove the guest molecules of MOFs, obtained powder was treated by heating under vacuum at 130 °C for 12 hours, resulting in 1.6 g of pure product which corresponds to 94% isolated yield. 0.1 g of the synthesized MOF was dissolved in 2 cc of DMF and then 3 mg of PdCl<sub>2</sub> with purity of 99.9% were added to the mixture. The solution was sonicated for 20 min, then stirred at 80° C for 20 h and finally it was stirred at 130°C with the purpose of reduction of Pd(II) to Pd (0) and encapsulation in MOF. Finally, the product (Pd NPs@Cu<sub>2</sub>(BDC)<sub>2</sub>(DABCO)) was centrifuged, washed with DMF and methanol and dried in vacuum at 120 °C for 12 h.

### **Catalyst Usage for the oxidation of benzyl alcohols**

In a typical oxidation, 0.5 ml substrate (grams for the solid benzyl alcohols), catalysts and base used as described in the manuscript and were added into a 10-ml three-neck round-bottom flask, which was fitted with a magnetic stirrer and an air inlet tube. The reaction was performed at 120 °C in an oil bath with magnetic stirring. A stream of air produced by air pump was conducted into the reaction mixture and controlled by a flow meter at a constant flow rate (5 ml min<sup>-1</sup>). After completion of the reaction that monitored by TLC, ethyl acetate was added to the reaction mixture and catalyst was filtered. Then, the filtrate was analyzed by GC. Solvent was evaporated under reduced pressure. All of the aldehydes characterized by melting point (for solids) and <sup>1</sup>H-NMR spectroscopy and confirmed with what is reported in the literature [48-52].

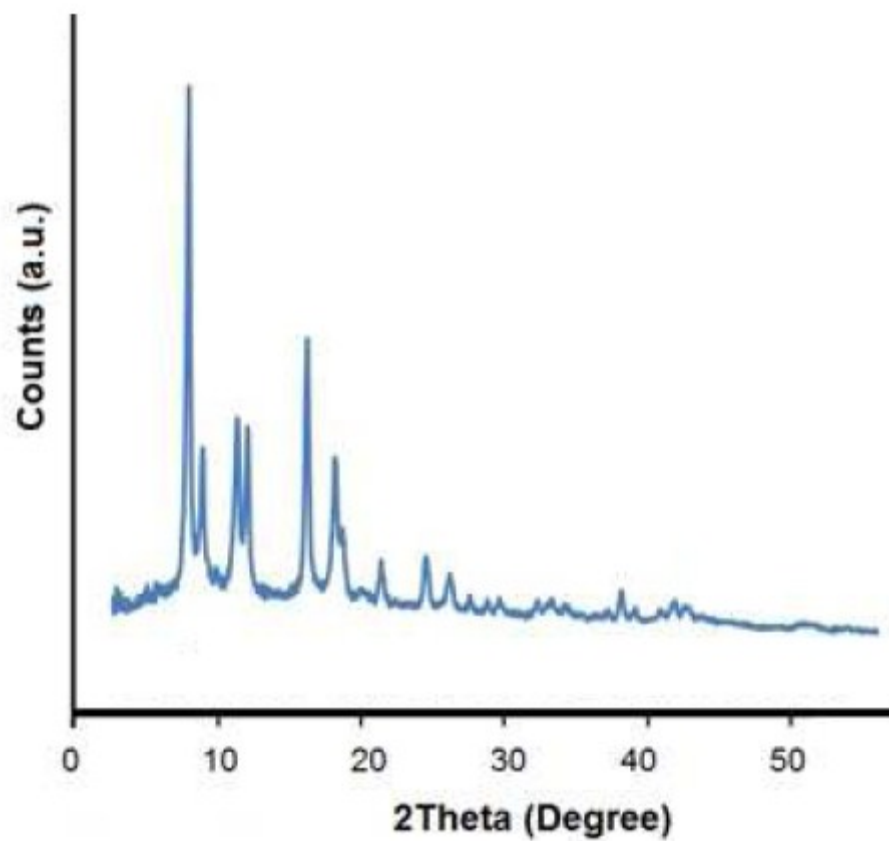

Fig S1. a) XRD pattern of recycling PdNPs@Cu<sub>2</sub>(BDC)<sub>2</sub>(DABCO)

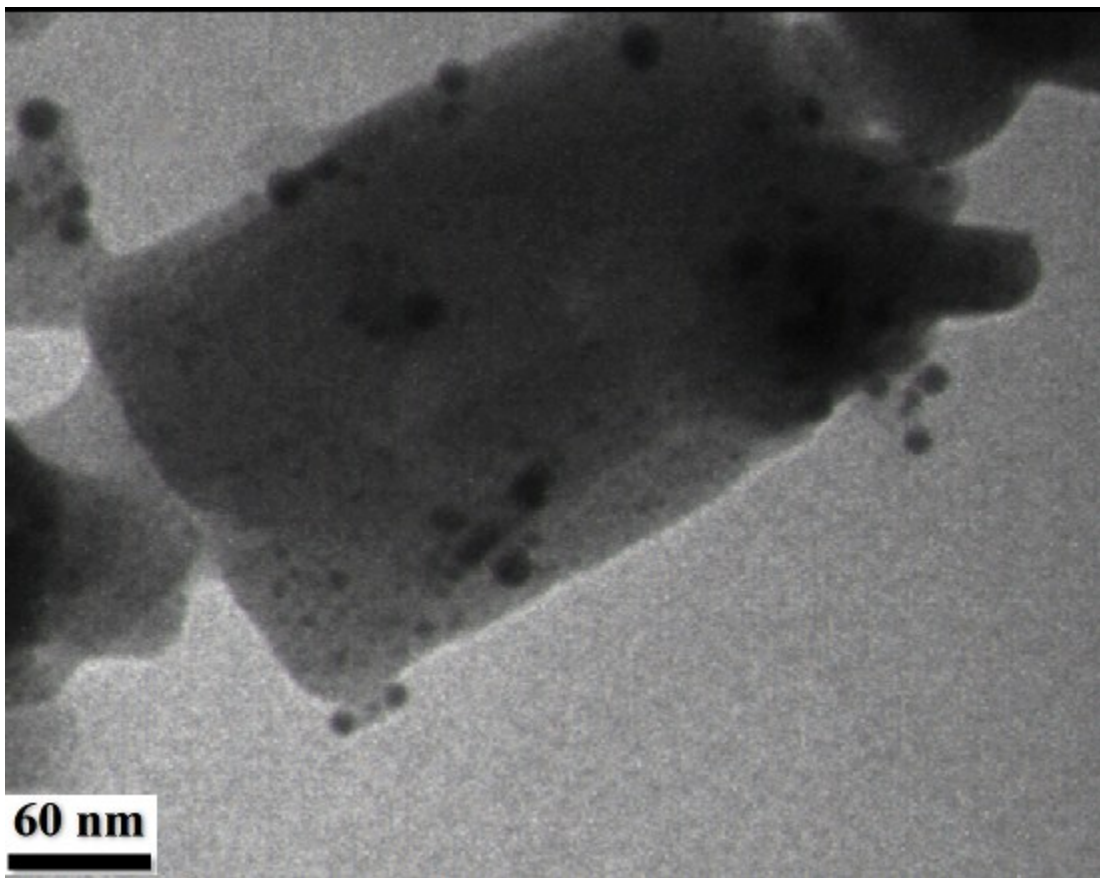

Fig S2. TEM micrograph of the recycled PdNPs/Cu<sub>2</sub>(BDC)<sub>2</sub>DABCO

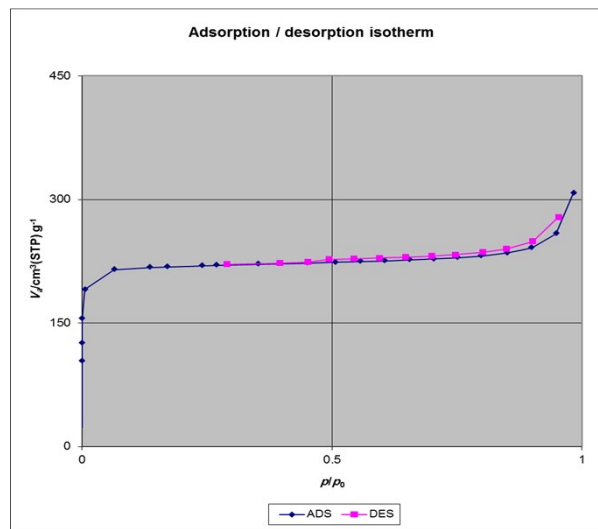

Isotherm Linear Plot

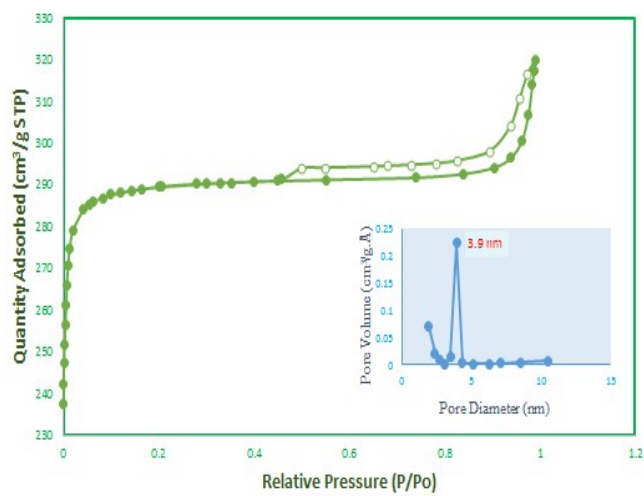

**Fig S3.** The N<sub>2</sub> adsorption–desorption isotherms of the nanoporous [Cu<sub>2</sub>(BDC)<sub>2</sub>(DABCO)] (Right) and PdNPs@[Cu<sub>2</sub>(BDC)<sub>2</sub>(DABCO)] (Left)

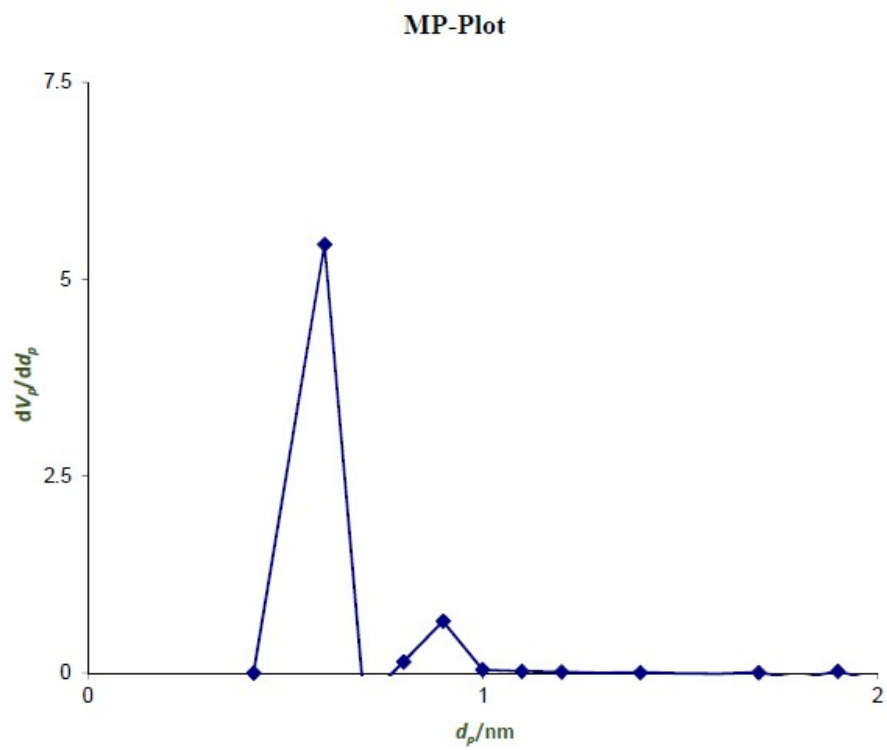

**Fig S4.** MP-Plot of the as-synthesized  $\text{Cu}_2(\text{BDC})_2(\text{DABCO})$

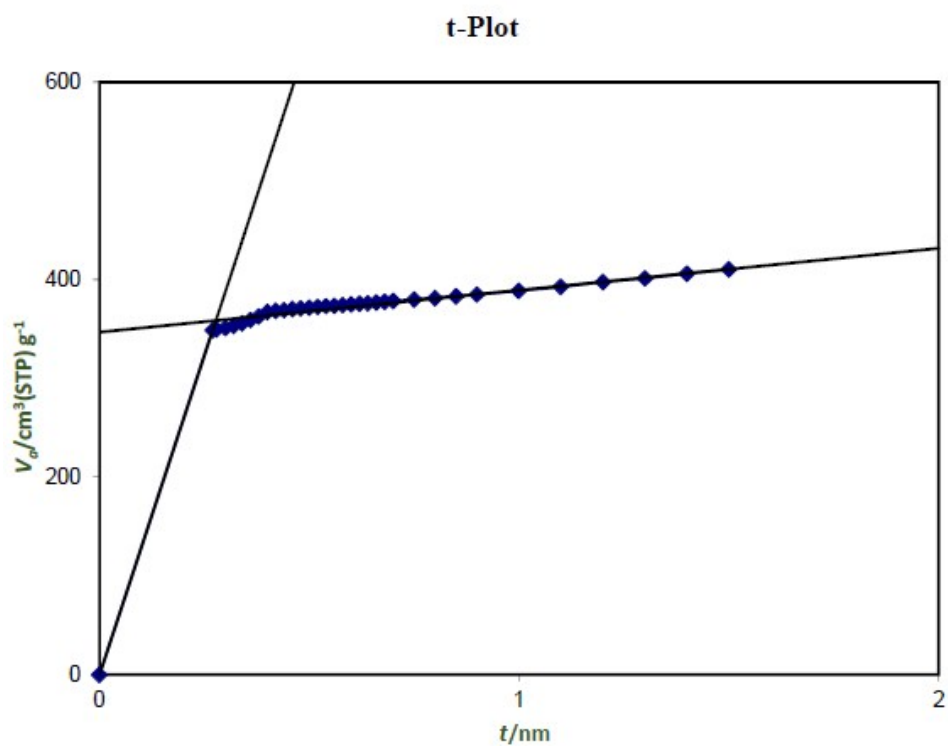

**Fig S5.** t-Plot of the as-synthesized  $\text{Cu}_2(\text{BDC})_2(\text{DABCO})$



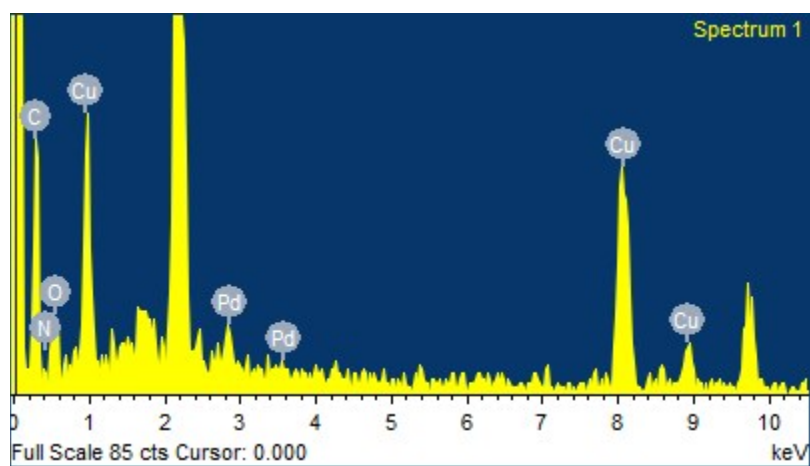

**Fig S7.** EDX analysis of Pd-NPs@Cu<sub>2</sub>(BDC)<sub>2</sub>DABCO

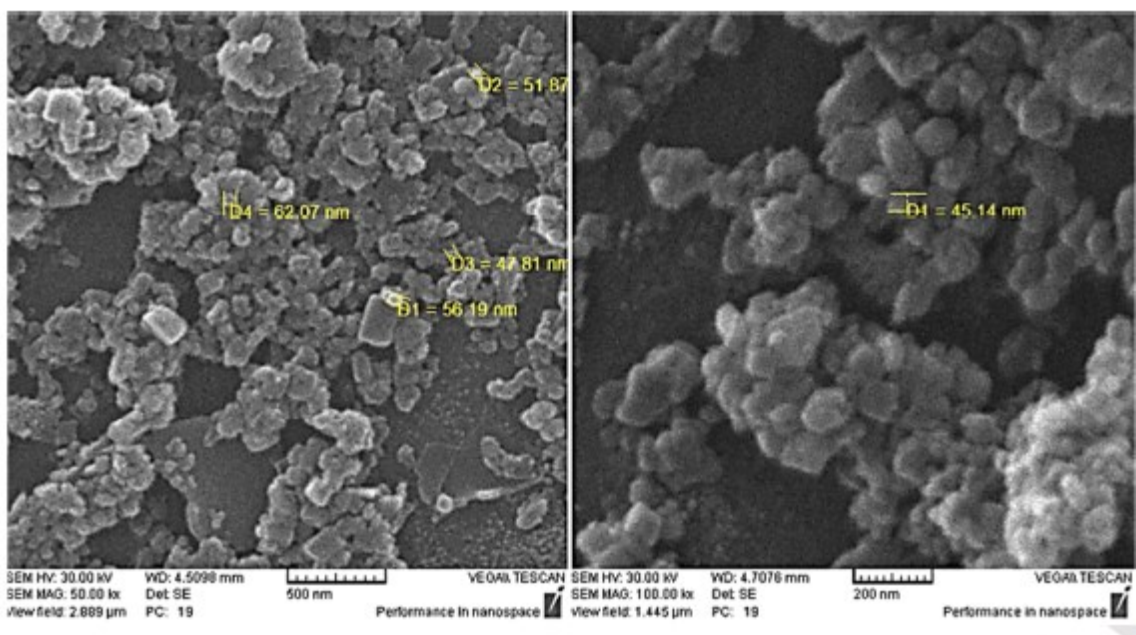

**Fig S8.** SEM image of  $\text{Cu}_2(\text{BDC})_2\text{DABCO}$

GC diagrams of Benzyl alcohols and Benzaldehydes:

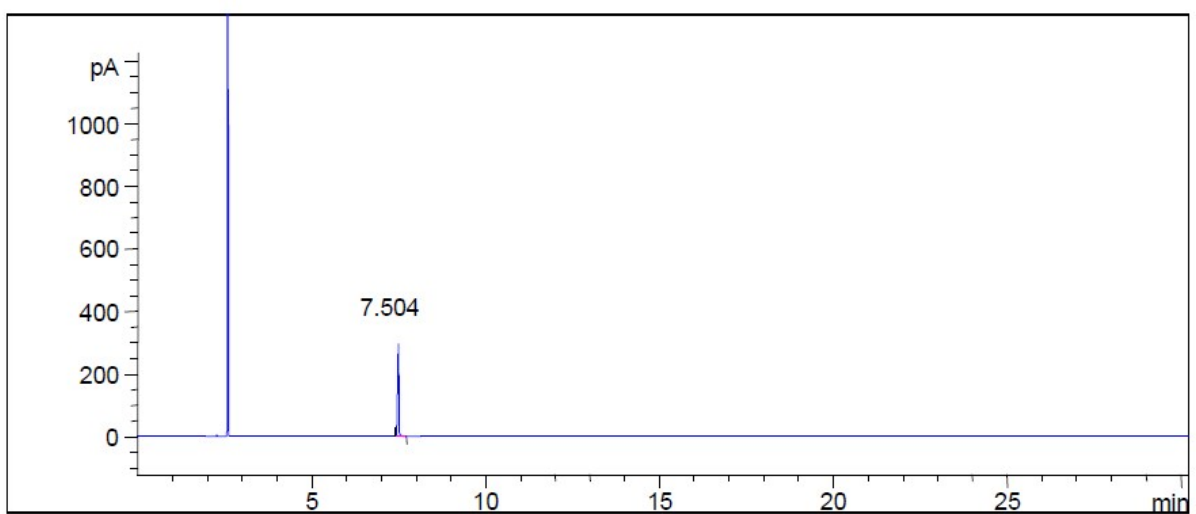

| Peak    | Ret. Time(min) | Area  | Height | Width  | Area(%) | Symmetry |
|---------|----------------|-------|--------|--------|---------|----------|
| 1       | 7.504          | 806.4 | 295.1  | 0.0384 | 100.00  | 1.867    |
| Totals: |                | 806.4 | 295.1  |        | 100.000 |          |

**Fig S9.** GC of benzyl alcohol

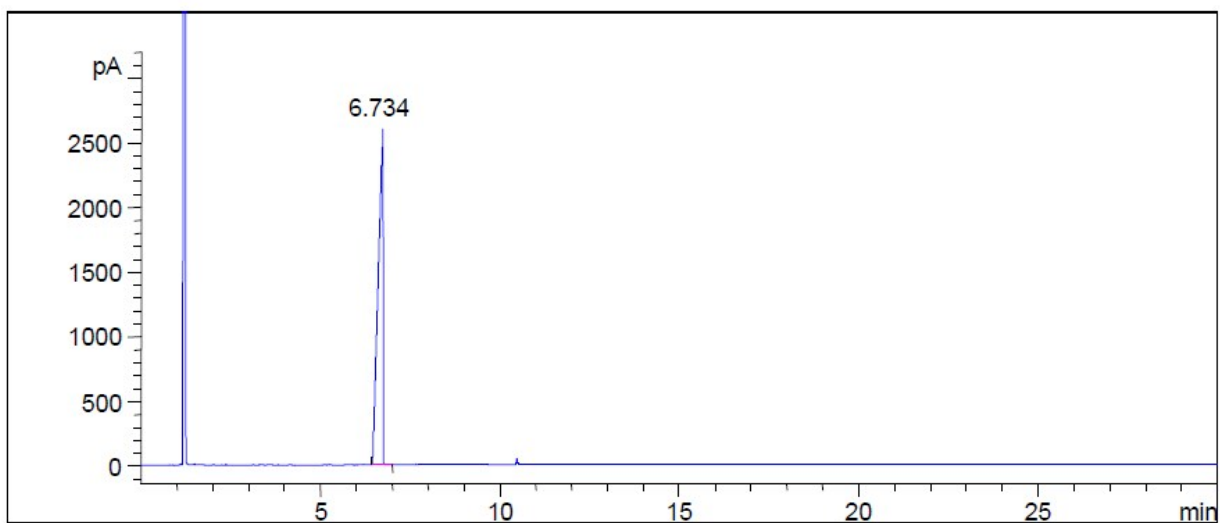

| Peak    | Ret. Time(min) | Area    | Height | Width  | Area(%) | Symmetry |
|---------|----------------|---------|--------|--------|---------|----------|
| 1       | 6.734          | 23741.0 | 2593.5 | 0.1108 | 100.000 | 15.867   |
| Totals: |                | 23741.0 | 2593.5 |        | 100.000 |          |

**Fig S10.** GC of oxidation of benzyl alcohol

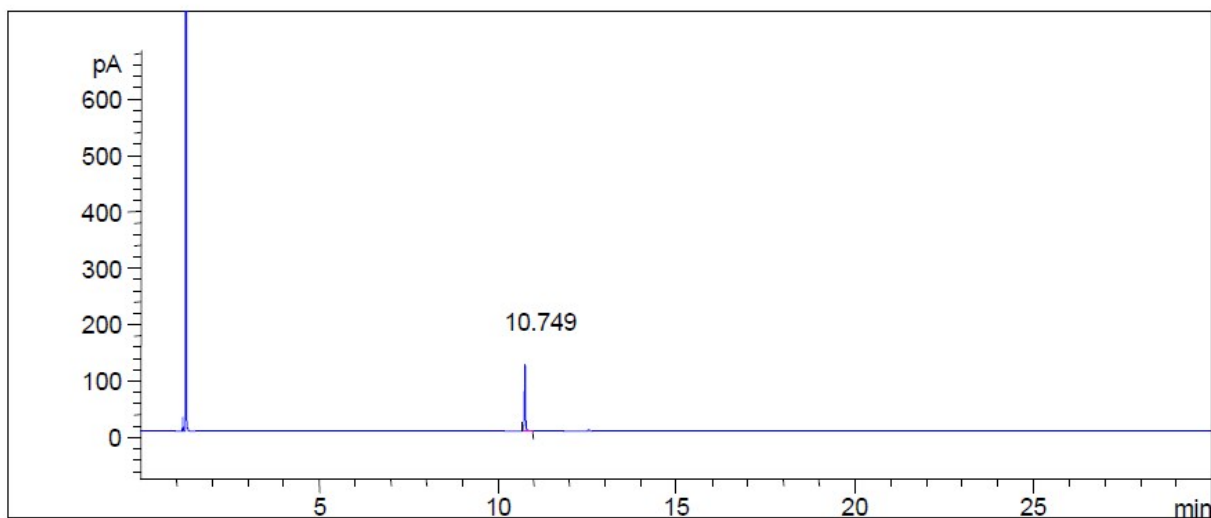

| Peak    | Ret. Time(min) | Area  | Height | Width  | Area(%) | Symmetry |
|---------|----------------|-------|--------|--------|---------|----------|
| 1       | 10.749         | 309.3 | 118.6  | 0.0399 | 100.000 | 0.981    |
| Totals: |                | 309.3 | 118.6  |        | 100.000 |          |

**Fig S11.** GC of 2-methylbenzyl alcohol

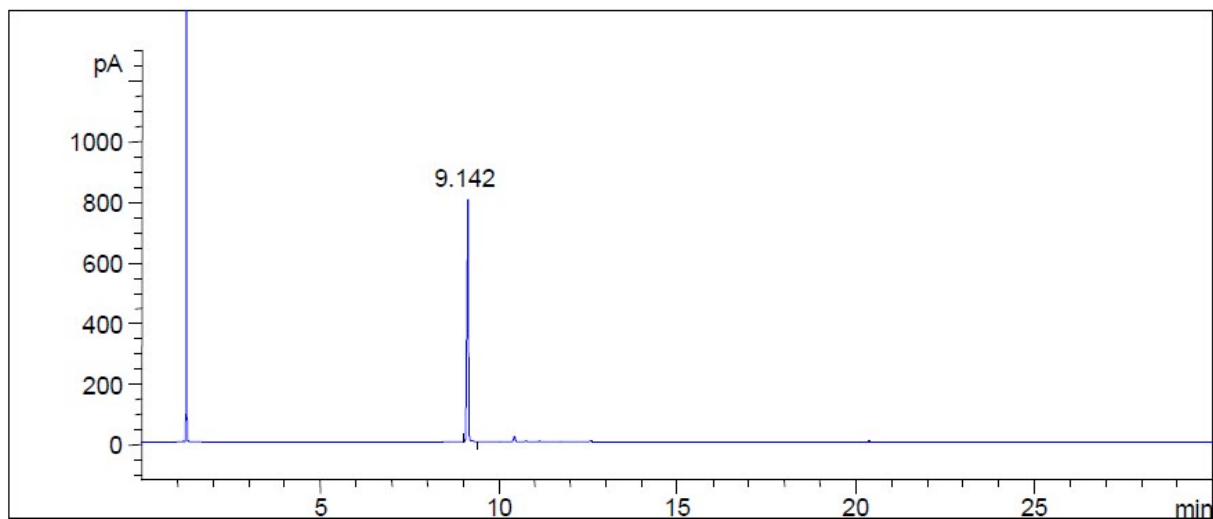

| Peak    | Ret. Time(min) | Area   | Height | Width  | Area(%) | Symmetry |
|---------|----------------|--------|--------|--------|---------|----------|
| 1       | 9.142          | 2631.7 | 799.8  | 0.0484 | 100.000 | 2.070    |
| Totals: |                | 2631.7 | 799.8  |        | 100.000 |          |

**Fig S12.** GC of oxidation of 2-methylbenzyl alcohol

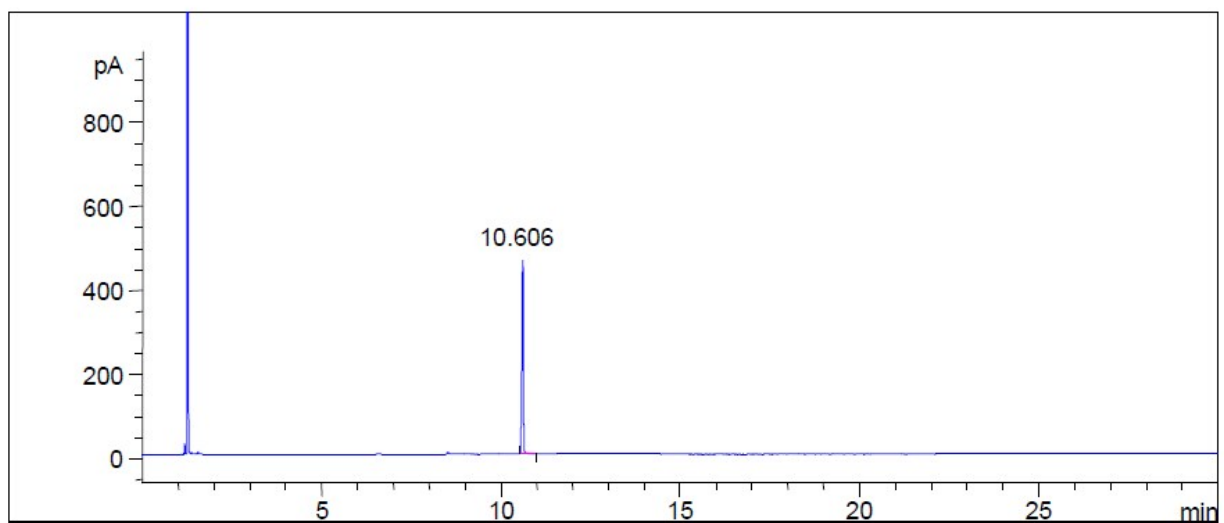

| Peak    | Ret. Time(min) | Area   | Height | Width  | Area(%) | Symmetry |
|---------|----------------|--------|--------|--------|---------|----------|
| 1       | 10.606         | 1413.5 | 460.9  | 0.0413 | 100.000 | 2.207    |
| Totals: |                | 1413.5 | 460.9  |        | 100.000 |          |

**Fig S13.** GC of 4-methylbenzyl alcohol

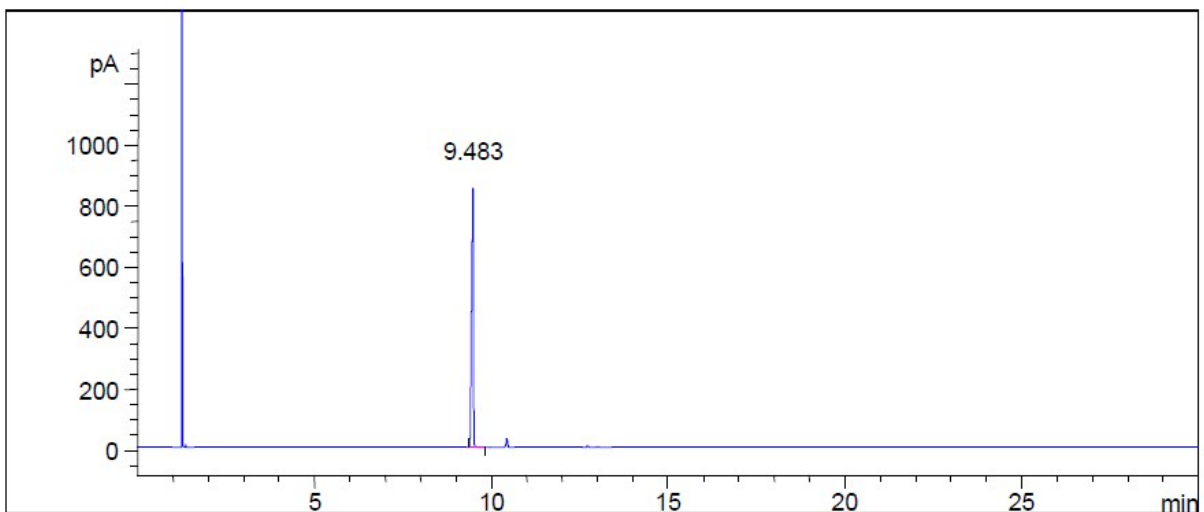

| Peak    | Ret. Time(min) | Area   | Height | Width  | Area(%) | Symmetry |
|---------|----------------|--------|--------|--------|---------|----------|
| 1       | 9.483          | 2843.2 | 849.9  | 0.0470 | 100.000 | 2.571    |
| Totals: |                | 2843.2 | 849.9  |        | 100.000 |          |

**Fig S14.** GC of oxidation of 4-methylbenzyl alcohol



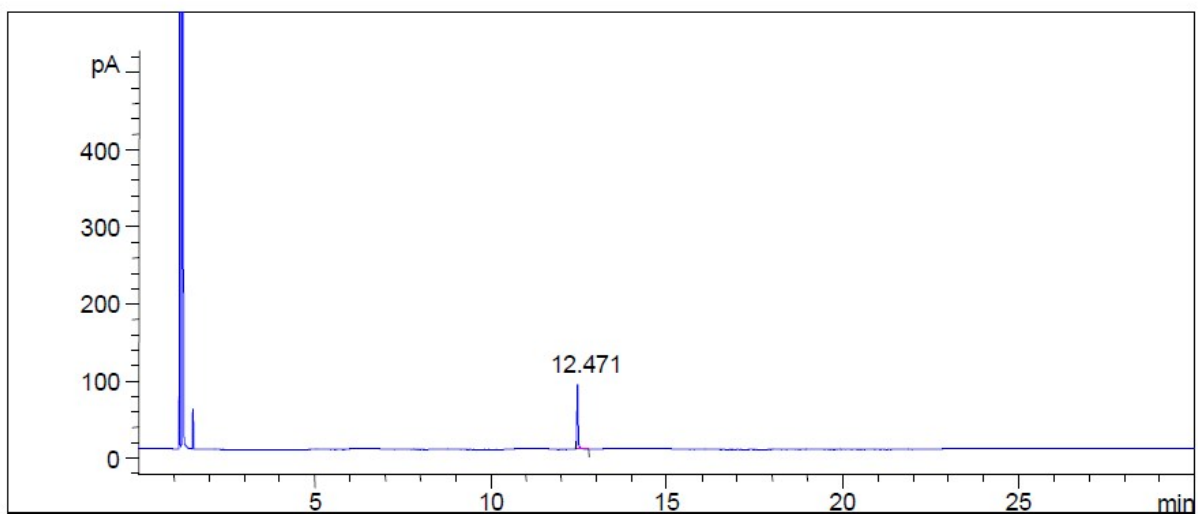

| Peak    | Ret. Time(min) | Area  | Height | Width  | Area(%) | Symmetry |
|---------|----------------|-------|--------|--------|---------|----------|
| 1       | 12.471         | 223.5 | 83.9   | 0.0401 | 100.000 | 0.887    |
| Totals: |                | 223.5 | 83.9   |        | 100.000 |          |

**Fig S15.** GC of 4-bromobenzyl alcohol

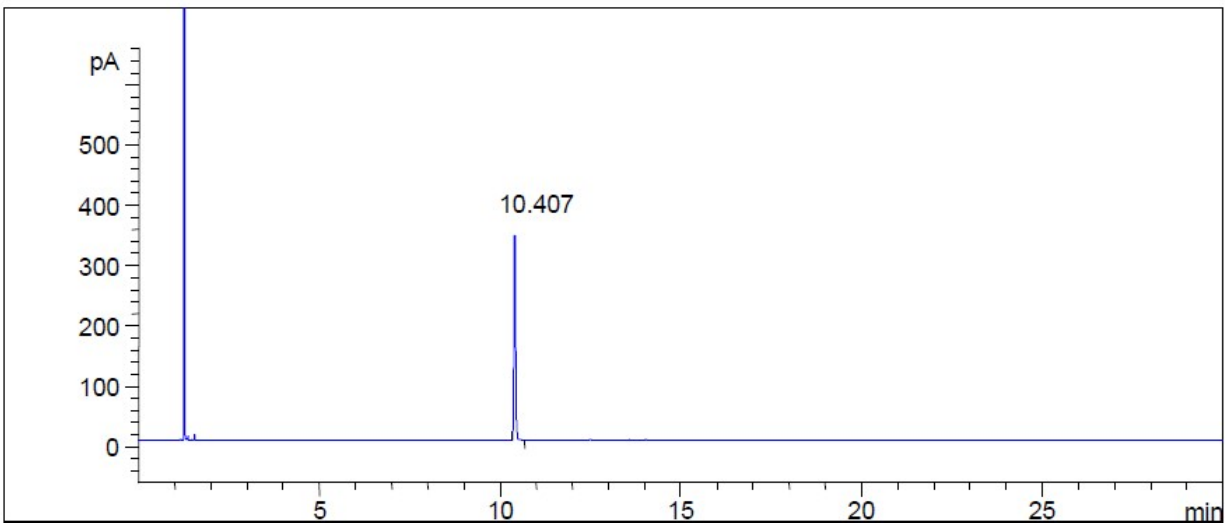

| Peak    | Ret. Time(min) | Area  | Height | Width  | Area(%) | Symmetry |
|---------|----------------|-------|--------|--------|---------|----------|
| 1       | 10.407         | 993.3 | 339.5  | 0.0441 | 100.000 | 1.096    |
| Totals: |                | 993.3 | 339.5  |        | 100.000 |          |

**Fig S16.** GC of oxidation of 4-bromobenzyl alcohol

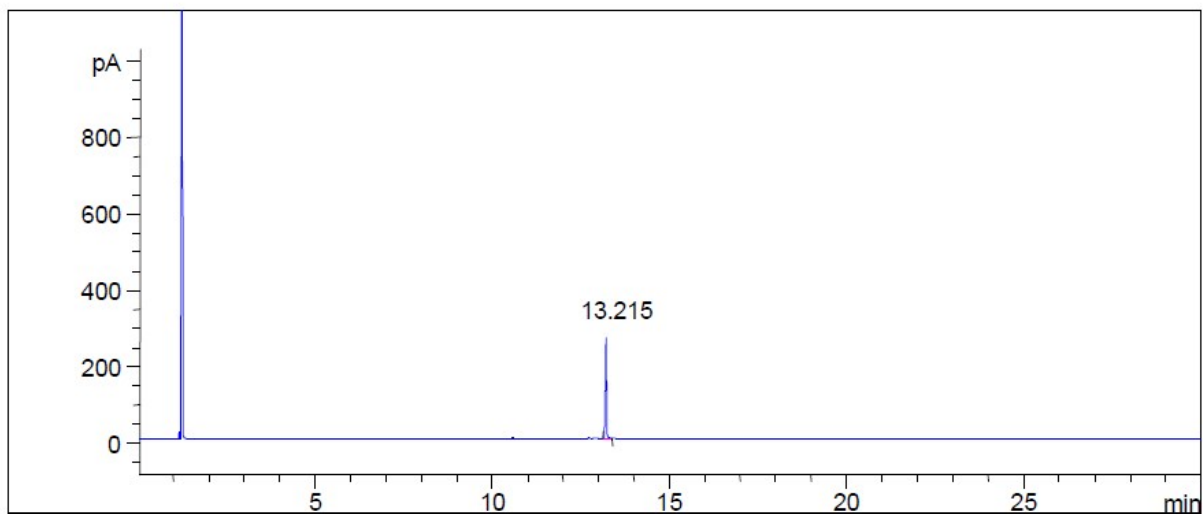

| Peak    | Ret. Time(min) | Area  | Height | Width  | Area(%) | Symmetry |
|---------|----------------|-------|--------|--------|---------|----------|
| 1       | 13.215         | 711.0 | 264.0  | 0.0404 | 100.000 | 1.526    |
| Totals: |                | 711.0 | 264.0  |        | 100.000 |          |

**Fig S17.** GC of 4-methoxybenzyl alcohol

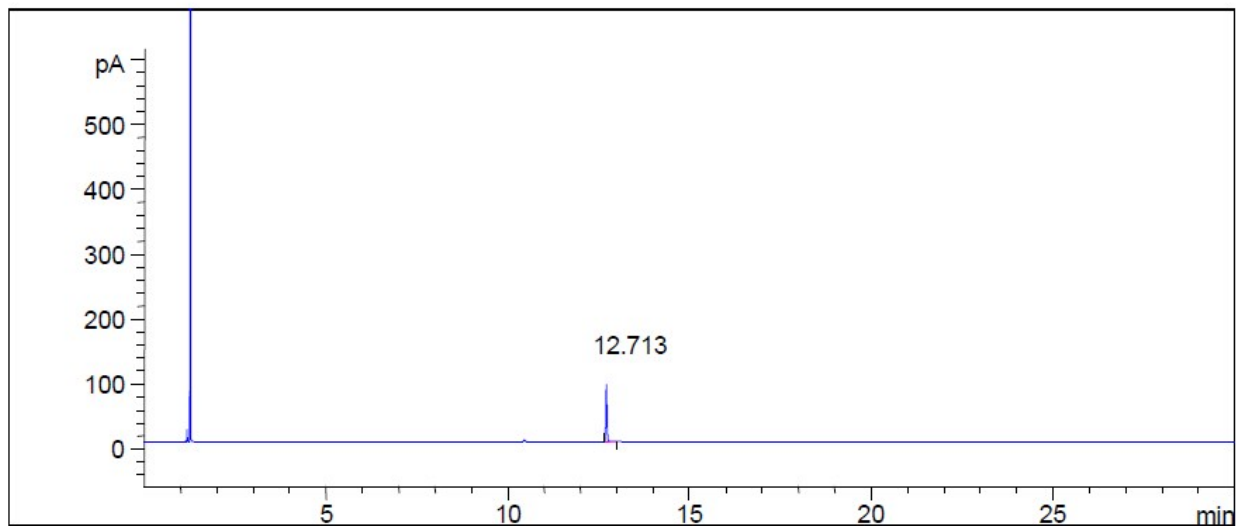

| Peak    | Ret. Time(min) | Area  | Height | Width  | Area(%) | Symmetry |
|---------|----------------|-------|--------|--------|---------|----------|
| 1       | 13.215         | 216.8 | 87.8   | 0.0383 | 100.000 | 0.930    |
| Totals: |                | 216.8 | 87.8   |        | 100.000 |          |

**Fig S18.** GC of oxidation of 4-methoxybenzyl alcohol

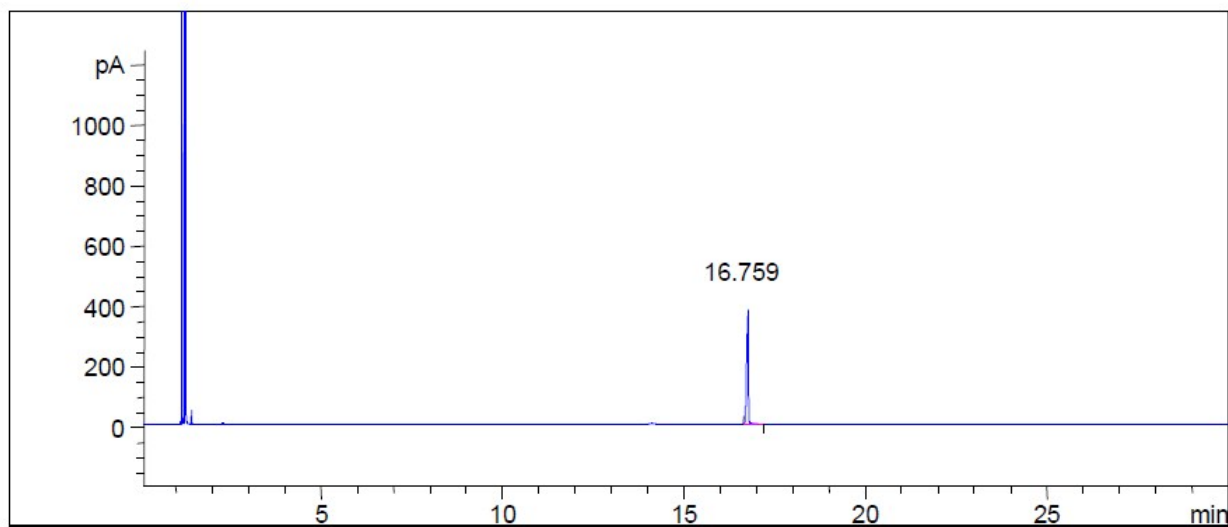

| Peak    | Ret. Time(min) | Area   | Height | Width  | Area(%) | Symmetry |
|---------|----------------|--------|--------|--------|---------|----------|
| 1       | 16.759         | 1215.0 | 377.6  | 0.0430 | 100.000 | 2.900    |
| Totals: |                | 1215.0 | 377.6  |        | 100.000 |          |

**Fig S19.** GC of 4-nitrobenzyl alcohol

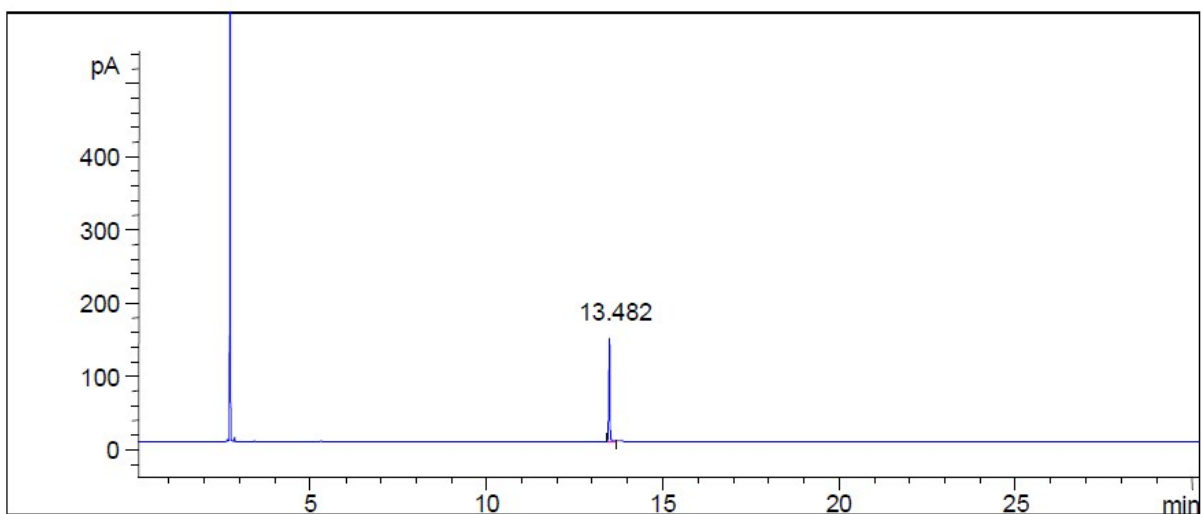

| Peak    | Ret. Time(min) | Area  | Height | Width  | Area(%) | Symmetry |
|---------|----------------|-------|--------|--------|---------|----------|
| 1       | 13.482         | 341.4 | 140.7  | 0.0363 | 100.000 | 1.418    |
| Totals: |                | 341.4 | 140.7  |        | 100.000 |          |

**Fig S20.** GC of oxidation of 4-nitrobenzyl alcohol

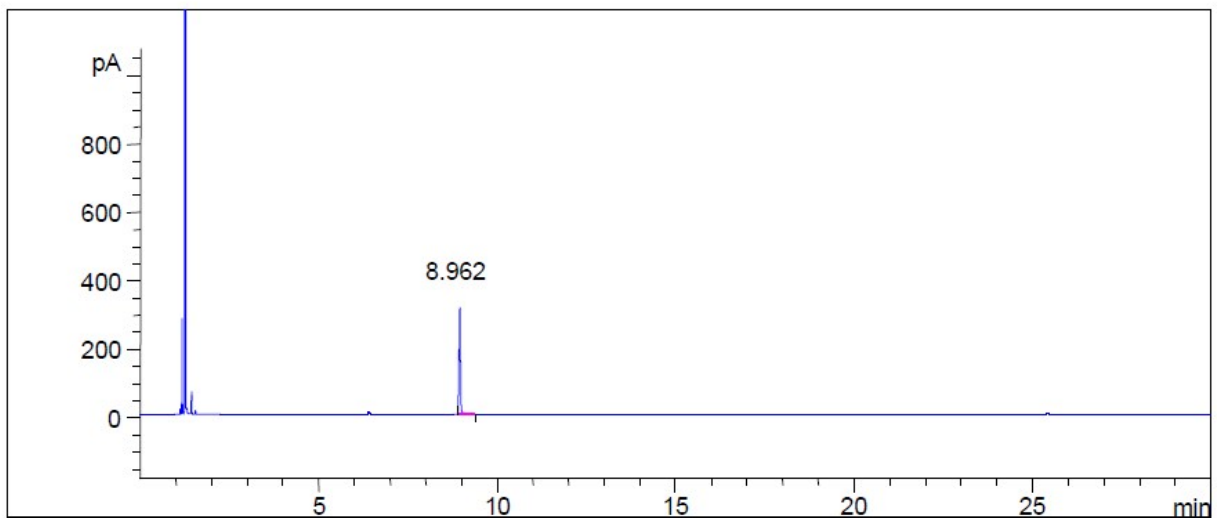

| Peak    | Ret. Time(min) | Area  | Height | Width  | Area(%) | Symmetry |
|---------|----------------|-------|--------|--------|---------|----------|
| 1       | 8.962          | 927.5 | 310.9  | 0.0433 | 100.000 | 1.258    |
| Totals: |                | 927.5 | 310.9  |        | 100.000 |          |

**Fig S21.** GC of 4-chlorobenzyl alcohol

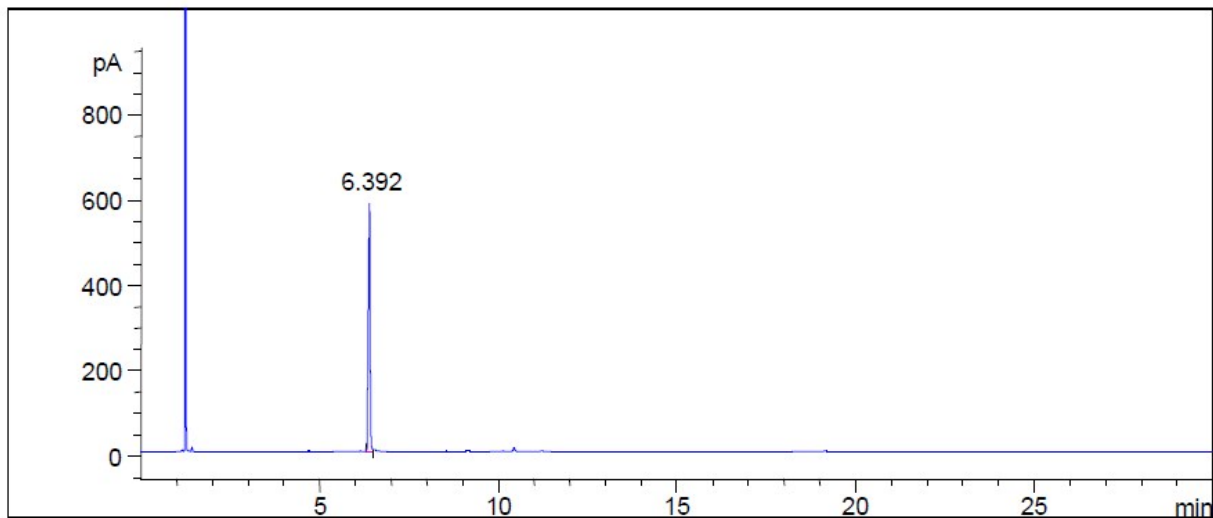

| Peak    | Ret. Time(min) | Area   | Height | Width  | Area(%) | Symmetry |
|---------|----------------|--------|--------|--------|---------|----------|
| 1       | 6.392          | 2166.0 | 581.0  | 0.0535 | 100.000 | 1.795    |
| Totals: |                | 2166.0 | 581.0  |        | 100.000 |          |

**Fig S22.** GC of oxidation of 4-chlorobenzyl alcohol



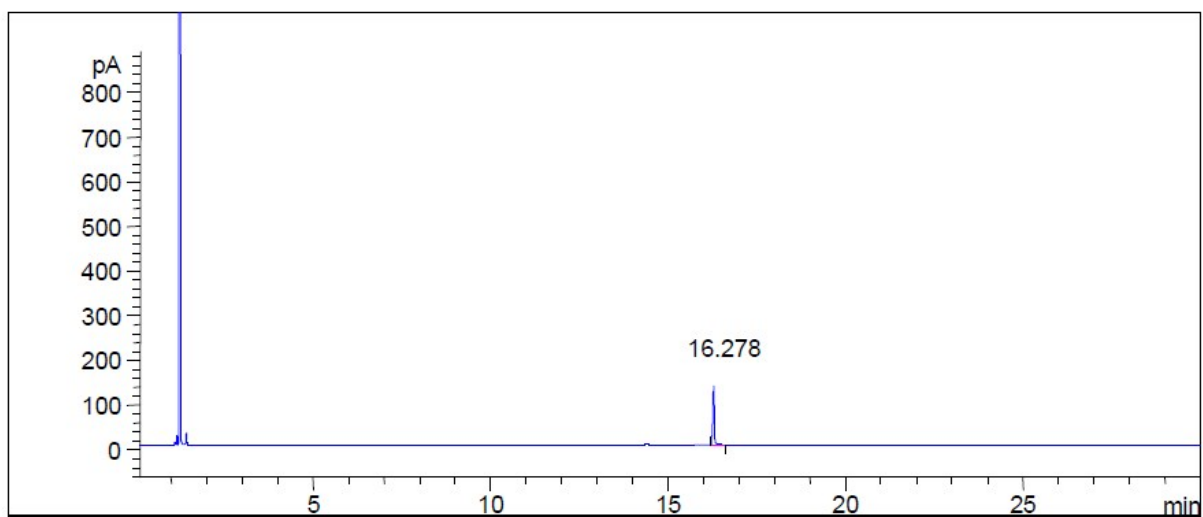

| Peak    | Ret. Time(min) | Area  | Height | Width  | Area(%) | Symmetry |
|---------|----------------|-------|--------|--------|---------|----------|
| 1       | 16.278         | 341.4 | 140.7  | 0.0363 | 100.000 | 1.418    |
| Totals: |                | 341.4 | 140.7  |        | 100.000 |          |

**Fig S23.** GC of 2-nitrobenzyl alcohol

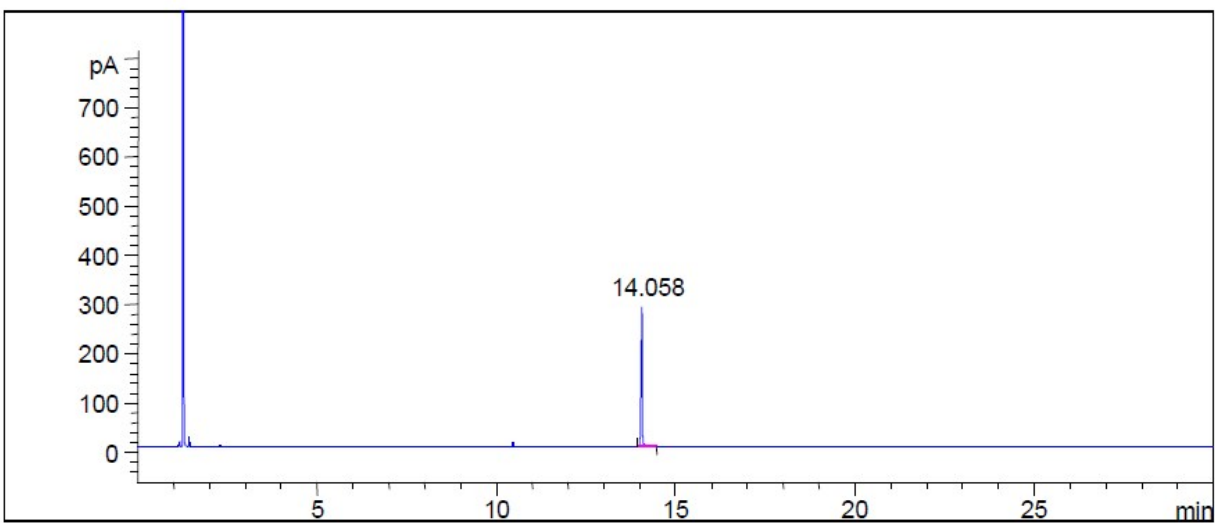

| Peak    | Ret. Time(min) | Area  | Height | Width  | Area(%) | Symmetry |
|---------|----------------|-------|--------|--------|---------|----------|
| 1       | 14.058         | 789.7 | 284.0  | 0.0399 | 100.000 | 1.580    |
| Totals: |                | 789.7 | 284.0  |        | 100.000 |          |

**Fig S24.** GC of oxidation of 2-nitrobenzyl alcohol

Selected  $^1\text{H}$ -NMR spectra:

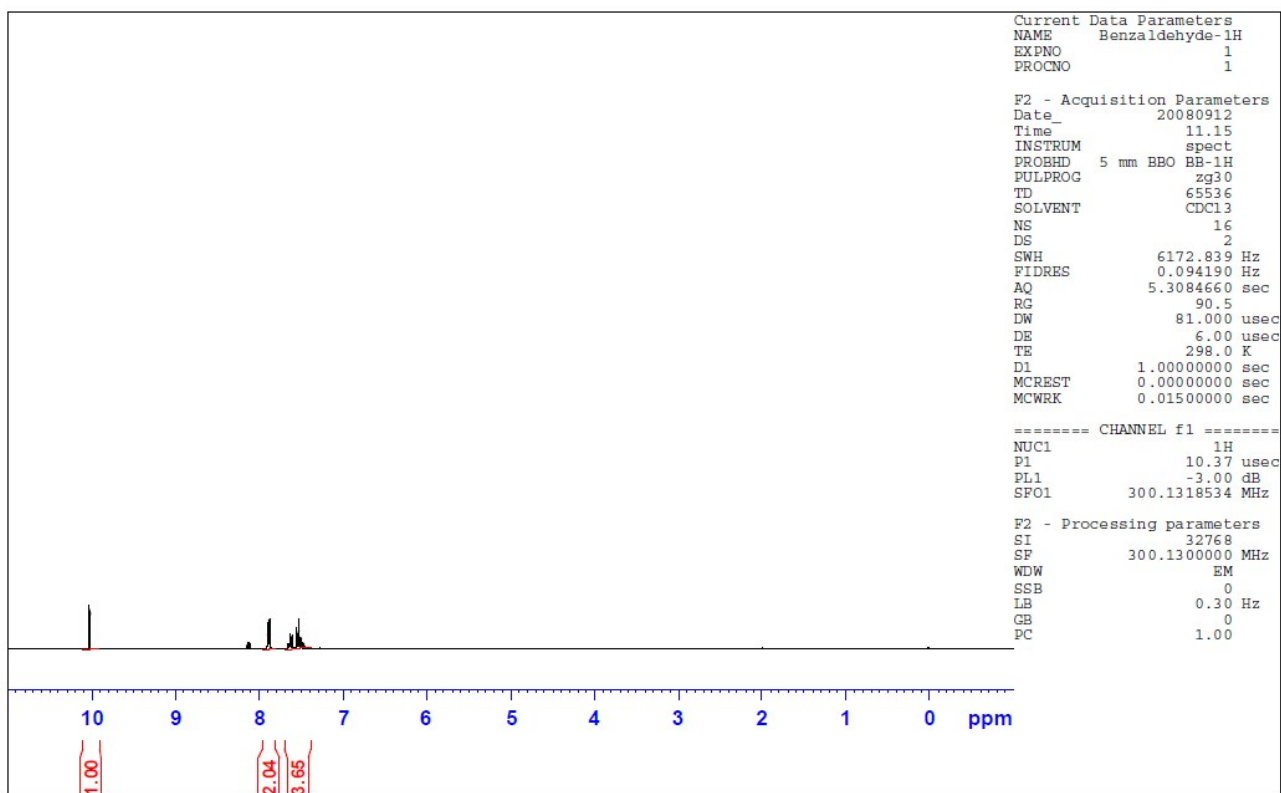

Fig S25.  $^1\text{H}$ -NMR of Benzaldehyde

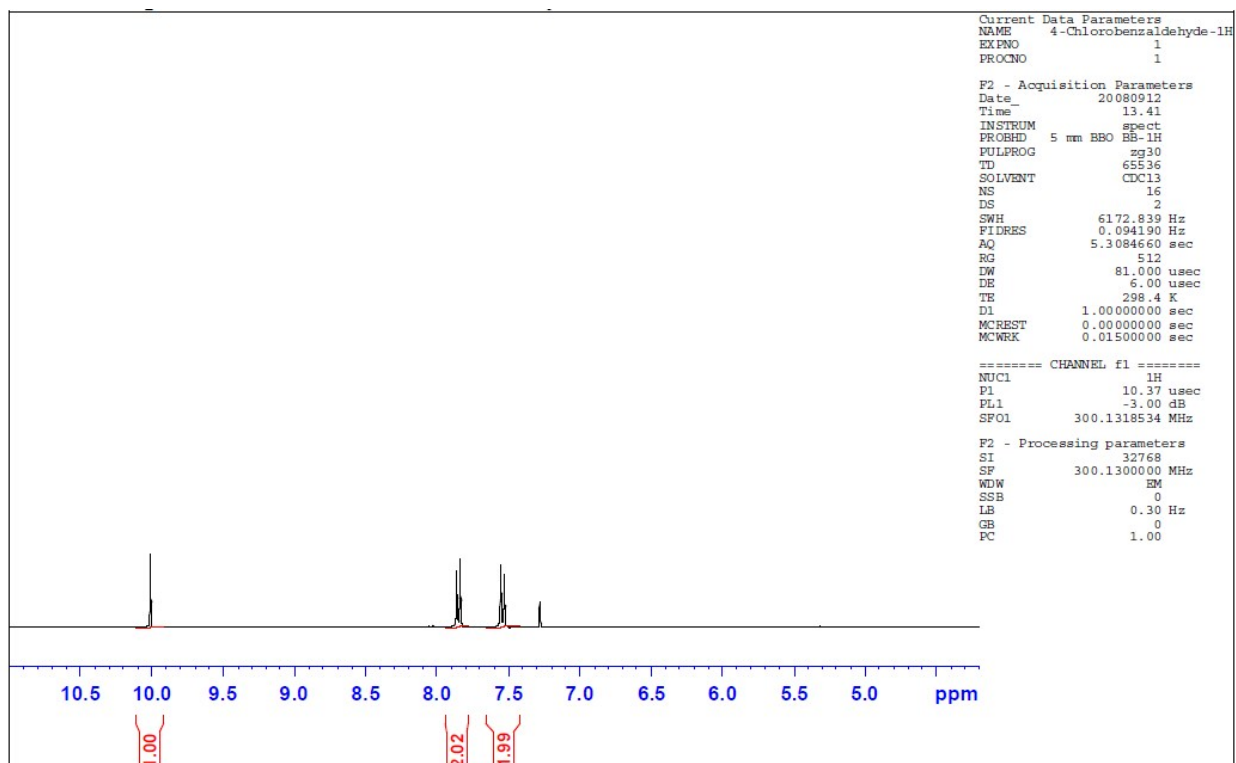

**Fig S26.** <sup>1</sup>H-NMR of 4-chlorobenzaldehyde
